# Supplementary material for: Detection of RNA–DNA binding sites in long noncoding RNAs
Source: PubMed Central journal article supplement — Nucleic Acids Res. 2019 Jan 30;47(6):e32. doi: 10.1093/nar/gkz037 (PMC6451187; doi:10.1093/nar/gkz037), 2019-01-30
Supplement: gkz037_supplemental_files.pdf [file gkz037_supplemental_files.pdf]

# Supplement: Detection of RNA-DNA binding sites in long non-coding RNAs

Chao-Chung Kuo<sup>1</sup>, Sonja Hänzelmann<sup>1,2</sup>, Nevcin Sentürk<sup>3</sup>, Stefan Frank<sup>4,5,6</sup>, Barna Zajzon<sup>1</sup>, Jens-Peter Derks<sup>4,5,6</sup>, Vijay Suresh Akhade<sup>7</sup>, Gaurav Ahuja<sup>4,5,6</sup>, Chandrasekhar Kanduri<sup>7</sup>, Ingrid Grummt<sup>3</sup>, Leo Kurian<sup>4,5,6</sup> and Ivan G. Costa<sup>\*1</sup>

<sup>1</sup>*Institute for Computational Genomics, Joint Research Center for Computational Biomedicine, RWTH Aachen Medical Faculty, 52074, Germany*

<sup>2</sup>*Klinik für Innere Medizin II, Universitätsklinikum Schleswig-Holstein, 24105, Kiel, Germany*

<sup>3</sup>*Division of Molecular Biology of the Cell II, German Cancer Research Center, 69120, Germany*

<sup>4</sup>*Center for Molecular Medicine Cologne, University of Cologne, 50923, Germany*

<sup>5</sup>*Institute for Neurophysiology, University of Cologne, 50923, Germany*

<sup>6</sup>*Cologne Cluster of Excellence in Cellular Stress Responses in Ageing-associated Diseases, University of Cologne, 50923, Germany*

<sup>7</sup>*Department of Medical Biochemistry and Cell Biology, University of Gothenburg, 40530, Sweden*

## List of Figures

|    |                                                                         |    |
|----|-------------------------------------------------------------------------|----|
| S1 | The scheme of TDF promoter test . . . . .                               | 5  |
| S2 | The scheme of TDF genomic region test . . . . .                         | 6  |
| S3 | Locations of triple helices predicted by TDF . . . . .                  | 7  |
| S4 | The coverage of triple helices within <i>HOTAIR</i> sequences . . . . . | 8  |
| S5 | Analyses of <i>GATA6-AS</i> . . . . .                                   | 9  |
| S6 | Analyses of <i>GATA6-AS</i> localization . . . . .                      | 10 |
| S7 | The time performances of TRIPLEXATOR and TRIPLEXES . . . . .            | 11 |
| S8 | The ROC plots of comparison of TDF and TRIPLEXATOR . . . . .            | 12 |

## List of Tables

|    |                                                                         |    |
|----|-------------------------------------------------------------------------|----|
| S1 | Candidate DBDs from <i>Fendrr</i> . . . . .                             | 13 |
| S2 | Top 10 target gene promoters of <i>Fendrr</i> . . . . .                 | 13 |
| S3 | Candidate DBDs from knockdown of <i>HOTAIR</i> . . . . .                | 13 |
| S4 | Top 10 target gene promoters of <i>HOTAIR</i> . . . . .                 | 14 |
| S5 | Candidate <i>MEG3</i> DBDs . . . . .                                    | 14 |
| S6 | <i>MEG3</i> complete transcript on Domain I Capture-Seq peaks . . . . . | 15 |

---

\*Lead Contact; Correspondence: ivan.costa@rwth-aachen.de

|     |                                                                          |    |
|-----|--------------------------------------------------------------------------|----|
| S7  | <i>MEG3</i> complete transcript on Domain II Capture-Seq peaks . . . . . | 16 |
| S8  | TDF analyses of 75 lncRNAs in cardiac differentiation . . . . .          | 19 |
| S9  | Candidate DBDs from <i>GATA6-AS</i> . . . . .                            | 19 |
| S10 | Targets of <i>GATA6-AS</i> predicted by TDF . . . . .                    | 20 |
| S11 | Oligos for RACE . . . . .                                                | 21 |
| S12 | Sequences of the ASOs used in this study . . . . .                       | 21 |
| S13 | ASO qPCR protocol . . . . .                                              | 22 |
| S14 | List of qPCR primers for ASO . . . . .                                   | 22 |
| S15 | ChOP oligos primers . . . . .                                            | 23 |
| S16 | ChOP qPCR primers for up-regulated targets . . . . .                     | 24 |
| S17 | ChOP qPCR primers for non targets . . . . .                              | 25 |
| S18 | RNA oligo (predicted DBD) used for DBD-Capture-Seq . . . . .             | 26 |

## 1 Materials

### 1.1 Cardiac Differentiation

Human pluripotent stem cells (hPSCs) were differentiated into cardiomyocytes as previously reported [1]. Cells were harvested at Day 0 (undifferentiated hPSCs) and day 4 (cardiac progenitors) and lysed in TRIzol (ThermoFisher). After RNA extraction, genomic DNA was removed by DNase digestion (ThermoFisher). Digested RNA was purified by ethanol precipitation and quality checked on a Bioanalyzer (Agilent 2100). Subsequently, 1  $\mu$ g of RNA was depleted of ribosomal RNA (RiboZero) and used for sequencing library prep. Sequencing was performed on an Illumina HiSeq 2000 with 60Mio paired-end 100 bp reads per sample.

Single-stranded RNA-Seq was measured for ES cells (Day 0) and after 96 hours (Day 4) in triplicates and with an average depth of 145 million reads per sample. Reads were aligned to HG38 genome with STAR [2] using GENCODE version 24 [3] as reference. Cuffdiff [4] was used to find differentially expressed genes ( $p$ -value < 0.001, absolute fold-change > 2, and the sum of expression > 5). This indicated 2,101 up-regulated genes and 2,317 genes as down-regulated. Of those up-regulated genes 75 genes were annotated in GENCODE as non-coding genes. We applied TDF promoter test on these 75 up-regulated non-coding genes to study their triplex-forming potential on the promoter regions of all up-regulated or down-regulated genes (Table S8).

### 1.2 *GATA6-AS* RACE and ASO experiments

Rapid amplification of cDNA ends (RACE) was performed using the SMARTer®RACE 5'/3' Kit (Clontech) following the manufacturers instructions. Specific primers used for *GATA6-AS* amplification can be found in the Table S11. PCR amplicons were cloned into plasmids and sequenced (>10 plasmid clones each) following the manufacturers protocol.

hESCs were maintained in FTDA medium [5] on matrigel-coated 6-well plates. When reaching confluency, cells were passaged by washing 1x with PBS and dissociating with Accutase (ThermoFisher #A1110501) supplemented with 10  $\mu$ M ROCK-inhibitor (Y-27632, Stemgent) at 37°C for 10 minutes. The reaction was stopped with 2 volumes F12/DMEM (ThermoFisher).

300,000–350,000 cells were centrifuged at 300x g for 2 minutes, suspended in 2 ml FTDA + 10  $\mu$ M ROCK-inhibitor and cultured at 37°C and 5% CO<sub>2</sub>. Media was changed in 24 h intervals with increasing FTDA volumes until cells reached confluency again.

150,000 cells were seeded in 1ml of FTA (FTDA without Dorsomorphine) supplemented with 10  $\mu$ M ROCK inhibitor. On the next day the media was changed prior to transfection (800  $\mu$ l FTA). Cells were transfected with 600 ng oligos and 600 ng of a control plasmid expressing GFP using a standard FUGENE protocol (oligo sequences are provided in Table S12). 6 hours after transfection, mesoderm differentiation was induced by adding 200  $\mu$ l FTA + 3.75 ng/ml BMP-4 (R&D #314-BP-010) + 1.875  $\mu$ M CHIR (Axon #1386). 18 hours after mesoderm induction medium was changed to transferrin/selenium (TS) medium (KO DMEM(ThermoFisher #10829-018), 1x TS (100x: 5.5  $\mu$ g/ml Transferrin (Sigma #T8158), 6.7 ng/ml Sodium Selenite (Sigma #S5261) in PBS (Millipore #BSS-1006-B)), 250  $\mu$ M 2-Phospho-L-Ascorbic Acid (Sigma #49752), 1x Penicillin/Streptomycin/Glutamine (ThermoFisher #10378016)). On the next day cells were collected in TRIZOL (ThermoFisher #15596018) and RNA was isolated according to the manufacturers protocol.

Following DNaseI-treatment, 500 ng RNA was reverse transcribed using MMLV reverse transcriptase (Promega #M170B). qPCR was performed using 1:8 diluted cDNA, 2x ORA™SEE qPCR Green ROX L Mix (highQu #QPD0505) and 5  $\mu$ M primers (protocol and a list of used primers are provided in Table S13 and S14).

### 1.3 Chromatin Oligo affinity Precipitation (ChOP)

The ChOP assay was performed as described before with some modifications [6]. Human ES cells (undifferentiated or day 4 of differentiation, 20 x 10<sup>6</sup> cells for each) were cross-linked using formaldehyde for 10 min at room temperature followed by quenching with 0.125M glycine. After centrifugation at 1000g at 40°C for 10 min, cells were resuspended in 2ml of buffer A (3mM MgCl<sub>2</sub>, 10mM Tris HCl, pH 7.4, 10mM NaCl, 0.5%v/v NP-40, 0.5mM PMSF and 100 units/ml RNasin) and incubated on ice for 20 min. Nuclei were harvested by centrifugation and resuspended in 1.2ml of buffer B (50mM Tris HCl, pH 7.4, 10mM EDTA, 0.5% Triton X-100, 0.1%SDS, 0.5mM PMSF and 100 units/ml RNasin) and incubated on ice for 40 min. An equal volume of buffer (15mM Tris HCl, pH 7.4, 150mM NaCl, 1mM EDTA, 1% Triton X-100, 0.5mM PMSF and 100 units/ml RNasin) was then added and incubated on ice for 15 min. Samples were sonicated using a Bioruptor sonicator (Diagenode) for 40 cycles (30 sec on, 30 sec off at High Pulse). Ten different oligos complimentary to *GATA6-AS* RNA were pooled with a final concentration of 10 $\mu$ M and then used for the RNA pull down. As a control, a pool of 10 oligos in reverse orientation to the *GATA6-AS* RNA targeting oligos was used. The oligos were added to the chromatin solution along with yeast tRNA (100 $\mu$ g/ml), salmon sperm DNA (100 $\mu$ g/ml), BSA (400 $\mu$ g/ml). After incubation overnight at 40°C, samples were then incubated with streptavidin agarose beads for 3 hours followed by two washes of low salt buffer (20mM Tris HCl, pH7.9, 150 mM NaCl, 2mM EDTA, 0.1% SDS, 1% TritonX-100, 0.5mM PMSF and 50 units/ml RNasin), two washes of high salt buffer (20mM Tris HCl, pH7.9, 500mM NaCl, 2mM EDTA, 0.1% SDS, 1% Triton X-100, 0.5mM PMSF and 50 units/ml RNasin) and one wash of 1x PBS. The beads were then incubated with elution buffer (1%SDS, 100 mM NaHCO<sub>3</sub>) for 45 min with intermittent mixing at 65°C followed by digestion

with proteinase K (80  $\mu\text{g}/\text{ml}$ ) and phenol/chloroform extraction method for DNA isolation. The fold enrichment over input was calculated considering the percentage of input chromatin used for ChOP and the Ct values obtained for the target from input DNA and ChOP DNA as follows:

$$\text{Fold enrichment over input} = \% \text{ of input} \times 2^{\text{Ct}(\text{input}) - \text{Ct}(\text{ChOP})}$$

These correspond to ChOP-PCR predictions shown in Fig. 4b. All the relevant oligo sequences are in Table S15, S16 and S17.

## 1.4 DBD-Capture-Seq

RNA-free genomic DNA from H1 ES cells was fragmented by sonication using Bioruptor Pico (Diagenode) to an average size of 200-300 bp. A total of 6-7  $\mu\text{g}$  of fragmented DNA was incubated with 20 pmoles of biotin labeled-RNA oligonucleotides (Table S18) for 1 h at 37°C in 10 mM Tris-HCl (pH: 7.4), 50 mM KCl, 5 mM MgCl<sub>2</sub>, 40U of RNasin (Promega).

RNA-DNA complexes were bound to MyOne Streptavidin C1 Dynabeads (Invitrogen) and washed three times in a buffer containing 10 mM Tris-HCl (pH: 7.4), 50 mM KCl, 5 mM MgCl<sub>2</sub>, 0.05% Tween-20. RNA-associated DNA was eluted with 25 ng/ $\mu\text{l}$  RNase A and 5 mU/ $\mu\text{l}$  of RNase I for 30 min at 37°C and recovered by phenol/chloroform extraction. Control experiments were based on the same protocol without the inclusion of an oligonucleotide. DNA libraries were prepared from two independent experiments using the NEBNext Ultra II DNA Library Prep Kit for Illumina (NEB) and NEBNext Multiplex Oligos for Illumina (NEB) and sequenced on a NexSeq500 Illumina platform.

### 1.4.1 TRIPLEXES AND TDF - Implementation details

TDF is implemented in Python and based on the regulatory genomics toolbox ([www.regulatory-genomics.org](http://www.regulatory-genomics.org)). TRIPLEXES is integrated directly into TDF via Python bindings. TDF is executed via the command line interface and requires as input FASTA files of lncRNAs and BED files of target regions (for the genomic region test) or a list of genes (for the promoter test).

All the results are reported in HTML interfaces. This output includes ranking of evaluated lncRNAs, listing of potential DBDs per lncRNA, and ranking of target DNA regions. TDF indicates the genes associated with the promoters or genes in the vicinity of the genomic regions, i.e., the closest upstream and downstream genes. TDF also provides sequences of all enriched DBDs, as well as BED files with the location of all DBDs and TTSs. These data allow users to explore interesting loci and triple helices in genome browsers.

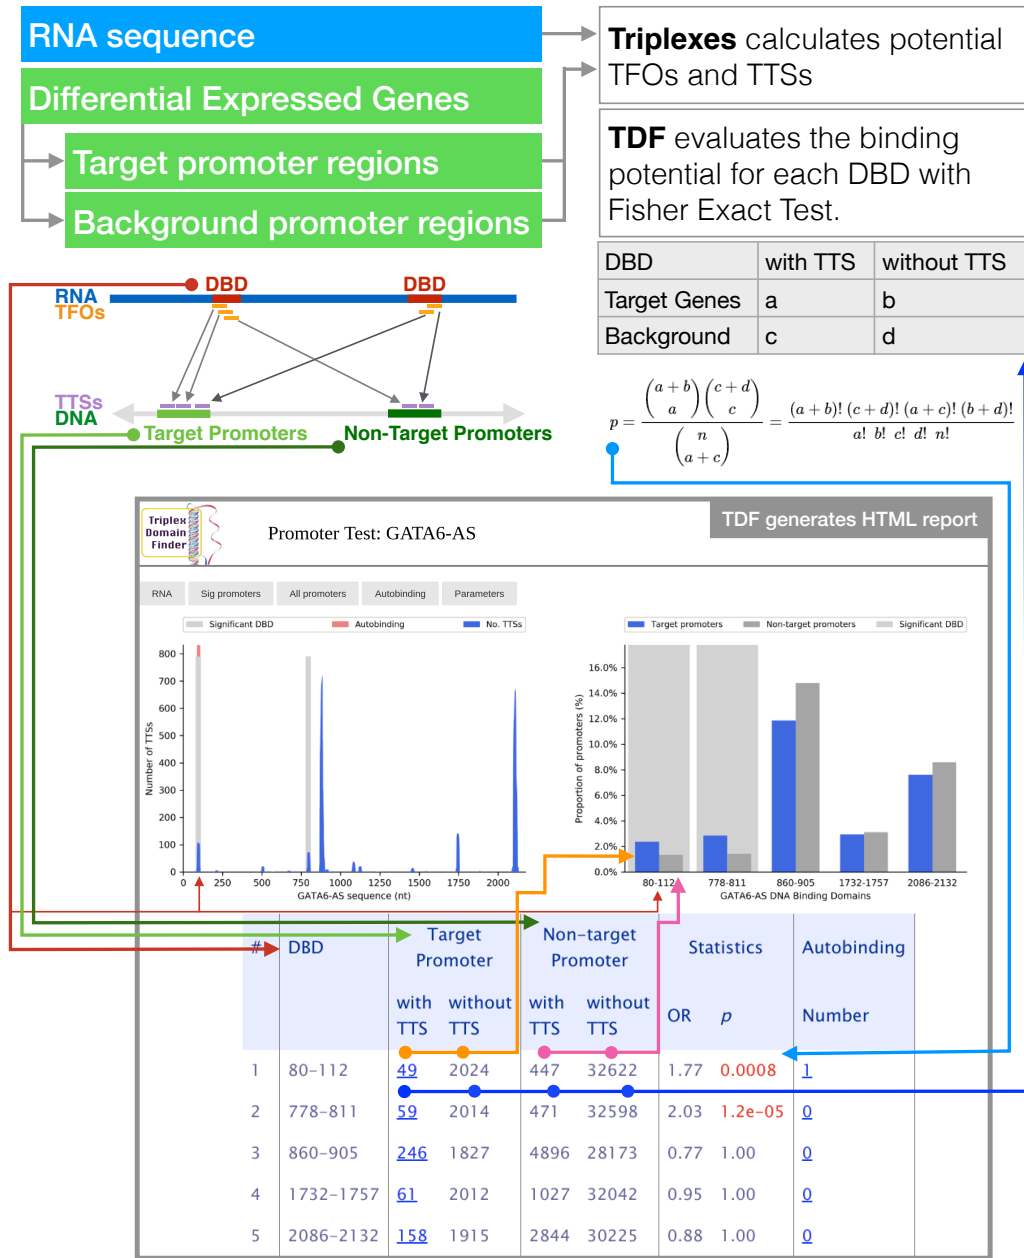

Figure S1: The scheme of TDF promoter test using *GATA6-AS* as the example. Promoter test requires RNA sequence and differentially expressed genes as the inputs. First, TDF uses TRIPLEXES to obtain all triple helices on target promoters and the non-target promoters. Next, it defines all DNA binding domains (DBD) by finding regions with contiguous TFOs (marked in red). For each DBD, TDF performs a Fisher exact test contrasting the amount of target vs. non-target promoters with at least one TTS. Arrows indicates the relation of the statistics and graphical representation of TDF report.

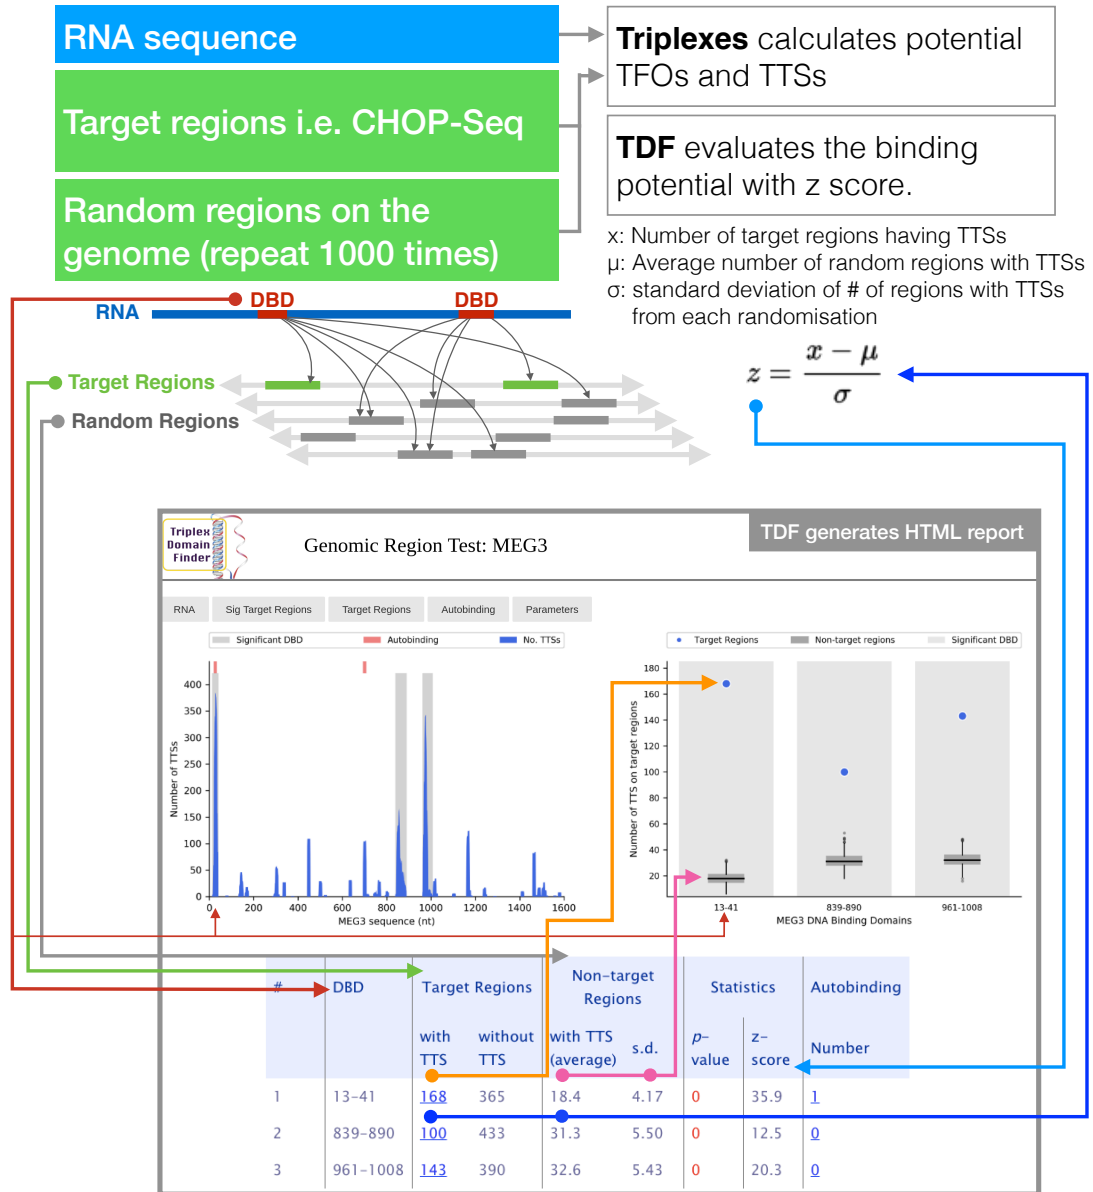

Figure S2: The scheme of TDF genomic region test using *MEG3* as the example. Genomic region test takes a RNA sequence and the target DNA regions as inputs. It generates random genomic regions with same size as the target regions (for 1,000 times). First, TRIPLEXES detects the triple helices on the target regions and all the random regions. Next, it defines all DNA binding domains (DBD) by finding regions with contiguous TFOs (marked in red) from triplexes predicted in target regions. Then it estimates an empirical  $p$ -value by evaluating the proportion of times a higher number of TTS is found in random regions than in the target regions. Arrows indicates the relation of the statistics and graphical representation of TDF report.

### A) TTSs of *Fendrr*

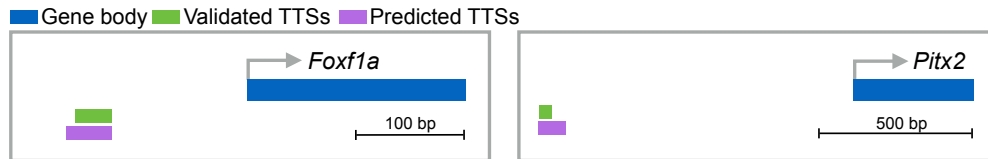

### B) TTSs of *HOTAIR*

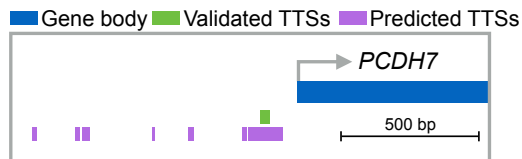

### C) TTSs of *MEG3*

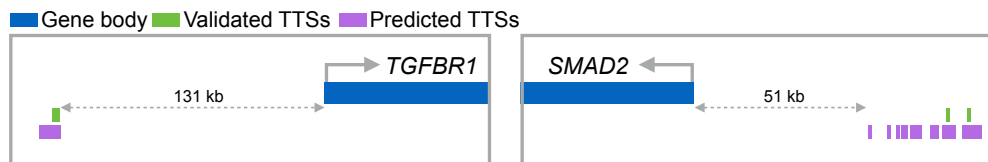

Figure S3: Locations of triple helices target sites (TTS) predicted by TDF in the targets of *Fendrr*, *HOTAIR* and *MEG3*.

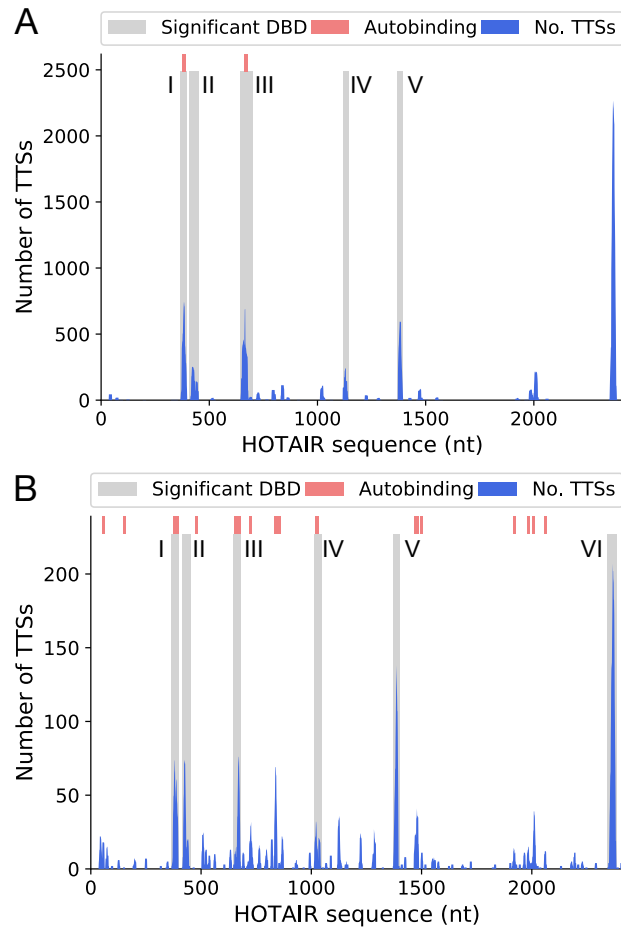

Figure S4: The coverage of triple helices (y-axis) within *HOTAIR* sequences (x-axis). **(A)** TDF promoter test on the up-regulated genes in knockdown of *HOTAIR*. Regions highlighted in gray indicate significant DBDs. Four out of five DBDs (I, III, IV and V) coincide with the ones detected with *HOTAIR* ChiRP-seq data in [7]. **(B)** TDF genomic region test on the *HOTAIR*-associated DNA regions from GRID-Seq. Regions highlighted in gray indicate significant DBDs. Five out of six DBDs (I, III, IV, V and VI) coincide with the ones detected with *HOTAIR* ChiRP-seq data.



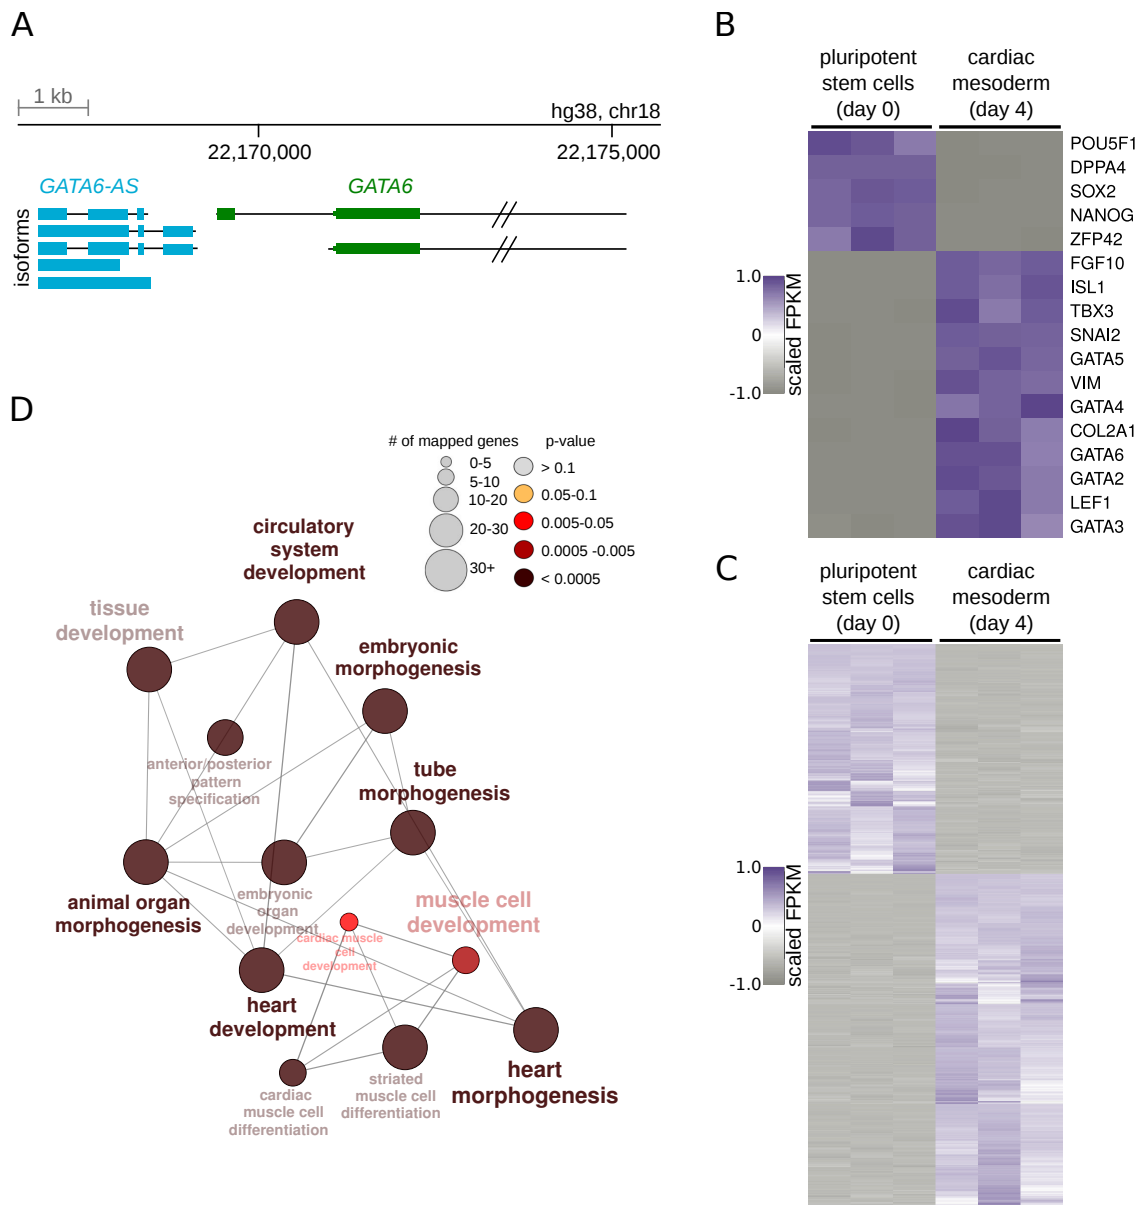

Figure S5: (A) Genome Browser view of the *GATA6-AS/GATA6* loci, depicting all experimentally confirmed isoforms for *GATA6-AS* (confirmed by 5' and 3' RACE-PCR using total RNA from day 4 cardiac mesoderm). (B) Heatmap depicting the expression profile of key markers for pluripotency and cardiac mesoderm. (C) Heatmap depicting expression profile of the differentially expressed genes between pluripotency and cardiac mesoderm ( $\text{Log}_2\text{FC} \geq 2$  or  $\leq -2$ ). (D) Functional enrichment analysis using GO annotations of the differentially expressed genes.

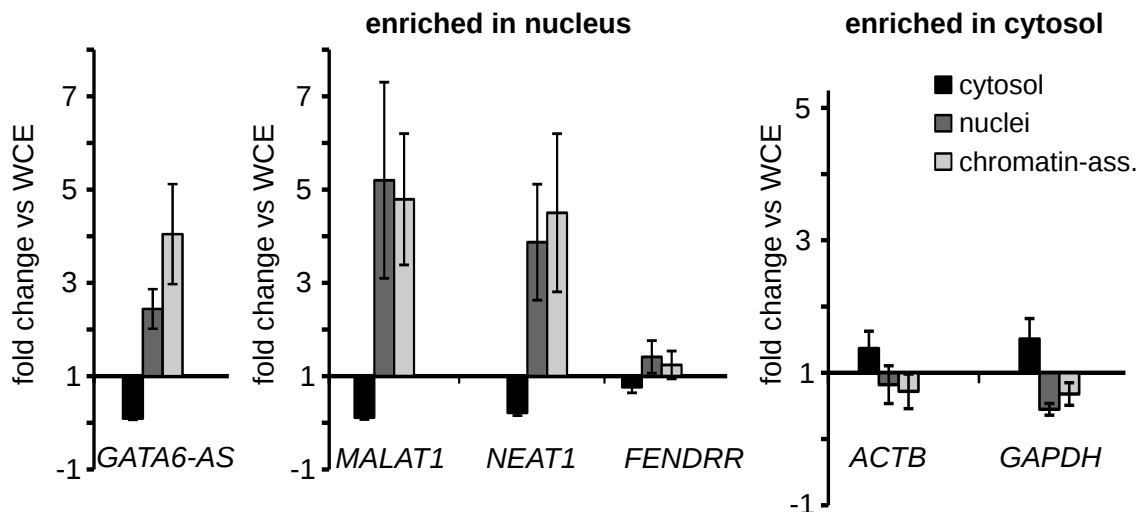

Figure S6: Bar graph representing the RT-qPCR results upon sub-cellular fractionation for *GATA6-AS*, along with nuclear enriched transcripts (*MALAT1*, *NEAT1* and *FENDRR*) and cytosol enriched transcripts (*ACTB* and *GAPDH*) of the indicated transcripts in different cellular fractions. WCE stands for whole cell extract.

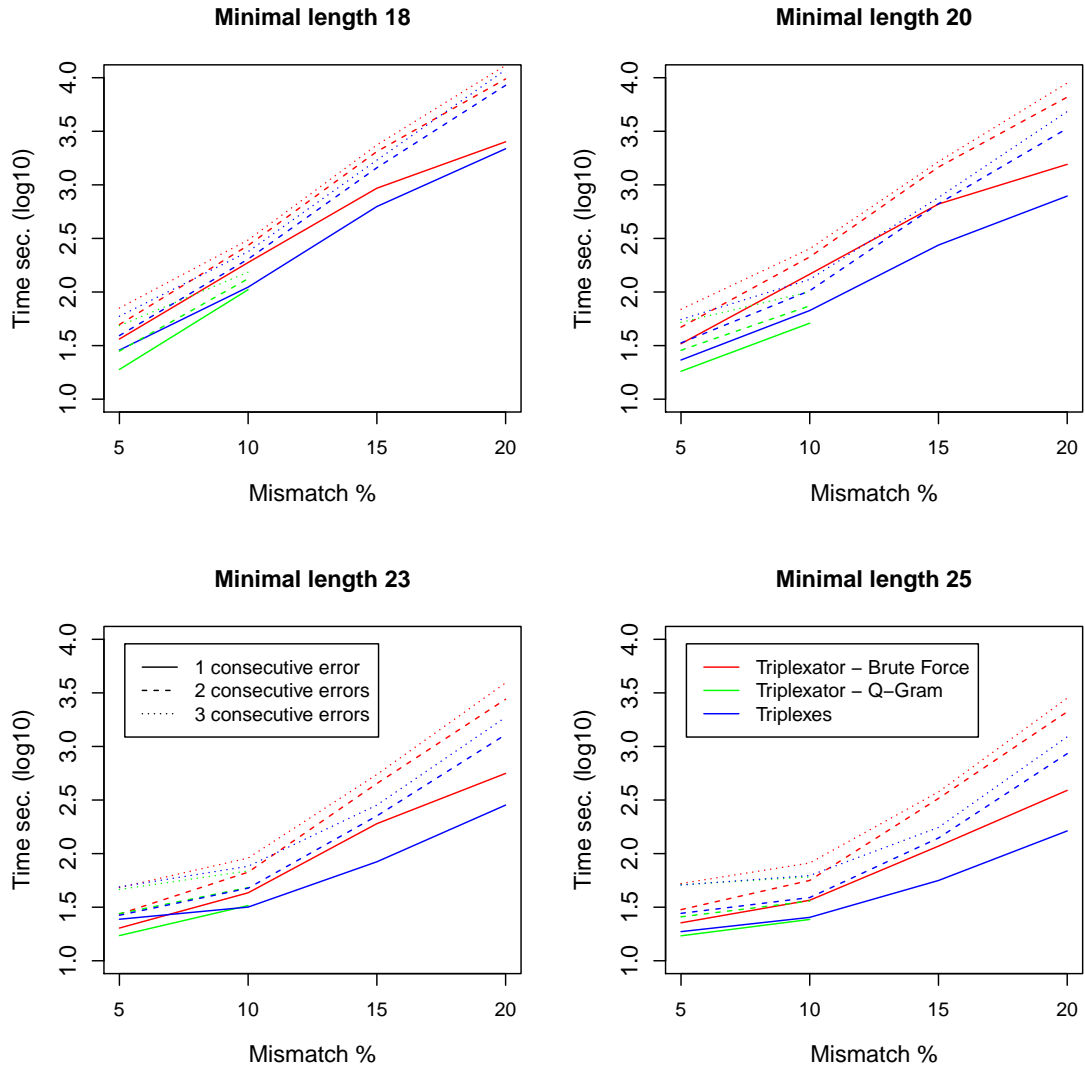

Figure S7: The time performances of TRIPLEXATOR (brute force and q-gram) and TRIPLEXES for varying minimum length, maximum mismatch rates and maximum number of consecutive errors.

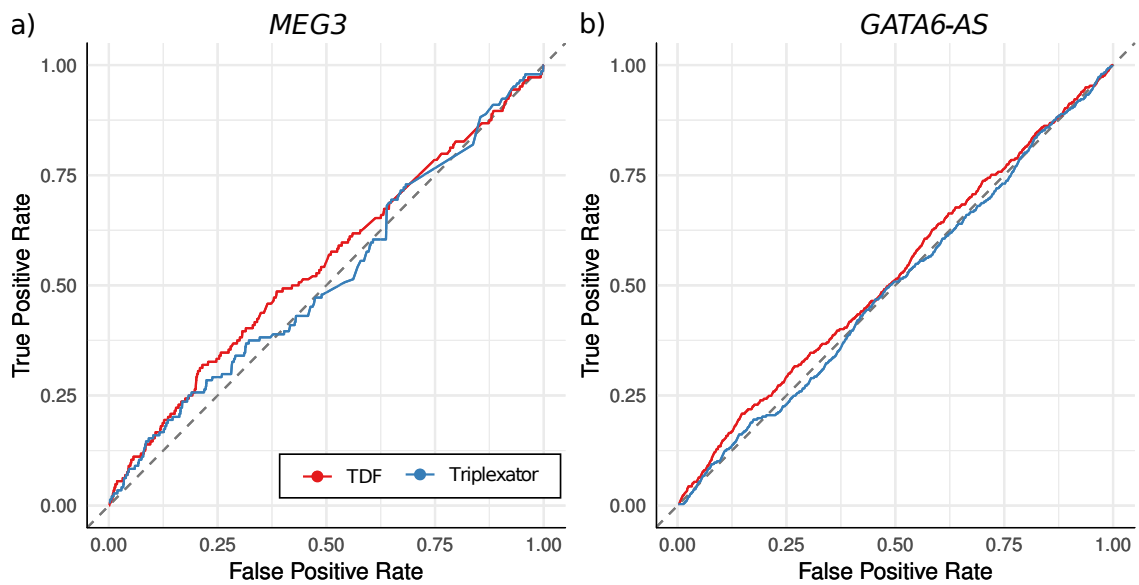

Figure S8: The Receiver Operating Characteristics (ROC) plots of comparison of TDF and TRIPLEXATOR for *MEG3* and *GATA6-AS*. TDF has an area under the curve of 0.52 for *GATA6-AS* and 0.56 for *MEG3*, while TRIPLEXATOR has AUC of 0.49 for *GATA6-AS* and 0.52 for *MEG3*.

| DBD Position     | Target Promoters |        | Non-Target Promoters |        | Statistics |                 |
|------------------|------------------|--------|----------------------|--------|------------|-----------------|
|                  | TTS              | no TTS | TTS                  | no TTS | Odds ratio | <i>p</i> -value |
| <b>1502-1565</b> | 286              | 1091   | 5964                 | 27022  | 1.19       | 0.0069          |

Table S1: Candidate DBDs from *Fendrr* ranked by *p*-values. The significant DBD is shown in bold.

| NO. | TTSs counts          | Sum of ranks                 |
|-----|----------------------|------------------------------|
| 1   | <i>E130309D14Rik</i> | 146 <b>Foxf1</b> 107         |
| 2   | <b>Pitx2</b>         | 126 <i>1700123M08Rik</i> 133 |
| 3   | <i>Psmg3</i>         | 124 <i>Lpxn</i> 151          |
| 4   | <i>Cntnap2</i>       | 101 <i>CFTR</i> 156          |
| 5   | <i>Ppapdc3</i>       | 91 <i>Hoxb3</i> 221          |
| 6   | <i>Hmgcll1</i>       | 71 <i>4930570G19Rik</i> 224  |
| 7   | <i>Cd79b</i>         | 40 <i>9330159F19Rik</i> 241  |
| 8   | <i>Fam19a5</i>       | 39 <i>Prelp</i> 242          |
| 9   | <i>D330050G23Rik</i> | 38 <i>Arntl2</i> 249         |
| 10  | <i>Setmar</i>        | 32 <i>Rnf208</i> 269         |

Table S2: Top 10 gene promoters based on different ranking strategies of *Fendrr*. The target genes which are mentioned in the main text are shown in bold.

| DBD Position     | Target Promoters |        | Non-Target Promoters |        | Statistics |                 |
|------------------|------------------|--------|----------------------|--------|------------|-----------------|
|                  | TTS              | no TTS | TTS                  | no TTS | Odds ratio | <i>p</i> -value |
| <b>366-398</b>   | 318              | 666    | 6426                 | 22919  | 1.70       | 6.7e-13         |
| <b>1117-1143</b> | 154              | 830    | 2520                 | 26825  | 1.98       | 5.5e-12         |
| <b>409-452</b>   | 268              | 716    | 5982                 | 23363  | 1.46       | 6.8e-07         |
| <b>1369-1396</b> | 363              | 621    | 8807                 | 20538  | 1.36       | 6.5e-06         |
| <b>643-702</b>   | 281              | 703    | 7107                 | 22238  | 1.25       | 0.0019          |
| 2347-2387        | 612              | 372    | 17559                | 11786  | 1.10       | 0.10            |
| 830-847          | 98               | 886    | 2905                 | 26440  | 1.01       | 0.56            |
| 1977-2027        | 172              | 812    | 6453                 | 22892  | 0.75       | 1.00            |

Table S3: Candidate DBDs from *HOTAIR* on the up-regulated genes in knockdown experiment ranked by *p*-values. The significant DBDs are shown in bold.

| NO. | Gene                | TTSs counts | TTS coverage |
|-----|---------------------|-------------|--------------|
| 1   | <i>COL6A1</i>       | 188         | 0.53         |
| 2   | <i>DCSH1</i>        | 47          | 0.35         |
| 3   | <i>PAPPA</i>        | 89          | 0.32         |
| 4   | <i>KLK4</i>         | 73          | 0.29         |
| 5   | <i>RSPO3</i>        | 60          | 0.25         |
| 6   | <b><i>PCDH7</i></b> | 72          | 0.24         |
| 7   | <i>PBX2</i>         | 52          | 0.23         |
| 8   | <i>IL11</i>         | 30          | 0.23         |
| 9   | <i>ADAMTS9</i>      | 41          | 0.22         |
| 10  | <i>PRDM12</i>       | 26          | 0.21         |

Table S4: Top 10 gene promoters based on ranking of TTS coverage. The target gene mentioned in the main text is shown in bold.

| DBDs position   | Target Regions |        | Random Regions |      | Statistics      |                 |
|-----------------|----------------|--------|----------------|------|-----------------|-----------------|
|                 | TTS            | no TTS | TTS (average)  | s.d. | <i>p</i> -value | <i>z</i> -score |
| <b>13-41</b>    | 168            | 365    | 17.8           | 4.13 | 0               | 36.4            |
| <b>961-1008</b> | 143            | 390    | 31.8           | 5.47 | 0               | 20.3            |
| <b>839-890</b>  | 100            | 433    | 30.6           | 5.41 | 0               | 12.8            |

Table S5: Candidate *MEG3* DBDs ranked by *z*-score. The significant DBDs are shown in bold.

| #  | DBD                 | Target Regions |             | Non-target Regions |      | Statistics |         | Autobinding Number |
|----|---------------------|----------------|-------------|--------------------|------|------------|---------|--------------------|
|    |                     | with TTS       | without TTS | with TTS (average) | s.d. | p-value    | z-score |                    |
| 1  | 9-41 (Domain I)     | 2660           | 2340        | 256.2              | 16.4 | 0          | 146.2   | 1                  |
| 2  | 1458-1498           | 1297           | 3703        | 67.9               | 8.71 | 0          | 141.1   | 0                  |
| 3  | 954-1032            | 2931           | 2069        | 461.4              | 20.1 | 0          | 122.9   | 0                  |
| 4  | 1159-1190           | 2023           | 2977        | 256.3              | 15.1 | 0          | 116.7   | 0                  |
| 5  | 130-156             | 984            | 4016        | 94.4               | 8.12 | 0          | 109.6   | 0                  |
| 6  | 629-644             | 859            | 4141        | 53.3               | 7.48 | 0          | 107.7   | 0                  |
| 7  | 492-512             | 492            | 4508        | 19.8               | 4.59 | 0          | 103.0   | 0                  |
| 8  | 839-890 (Domain II) | 2292           | 2708        | 441.5              | 18.7 | 0          | 99.1    | 0                  |
| 9  | 1499-1525           | 769            | 4231        | 55.0               | 7.23 | 0          | 98.8    | 0                  |
| 10 | 161-179             | 707            | 4293        | 48.6               | 7.08 | 0          | 93.0    | 0                  |
| 11 | 327-346             | 563            | 4437        | 41.5               | 6.08 | 0          | 85.8    | 0                  |
| 12 | 284-319             | 1131           | 3869        | 196.1              | 12.8 | 0          | 72.9    | 0                  |
| 13 | 442-458             | 1023           | 3977        | 161.7              | 12.3 | 0          | 70.1    | 0                  |
| 14 | 737-776             | 962            | 4038        | 210.7              | 14.0 | 0          | 53.5    | 0                  |
| 15 | 693-730             | 1587           | 3413        | 450.7              | 21.7 | 0          | 52.3    | 1                  |
| 16 | 1091-1112           | 134            | 4866        | 5.82               | 2.64 | 0          | 48.5    | 0                  |
| 17 | 1234-1254           | 409            | 4591        | 60.2               | 7.99 | 0          | 43.7    | 0                  |
| 18 | 791-811             | 126            | 4874        | 6.63               | 2.82 | 0          | 42.3    | 0                  |
| 19 | 517-533             | 72             | 4928        | 4.90               | 2.09 | 0          | 32.1    | 0                  |
| 20 | 1280-1296           | 60             | 4940        | 4.24               | 2.09 | 0          | 26.6    | 0                  |
| 21 | 1573-1588           | 183            | 4817        | 35.0               | 5.76 | 0          | 25.7    | 0                  |
| 22 | 1405-1421           | 67             | 4933        | 10.5               | 3.12 | 0          | 18.1    | 0                  |

Table S6: *MEG3* complete transcript on Domain I Capture-Seq peaks.

| #  | DBD                 | Target Regions |             | Non-target Regions |      | Statistics |         | Autobinding Number |
|----|---------------------|----------------|-------------|--------------------|------|------------|---------|--------------------|
|    |                     | with TTS       | without TTS | with TTS (average) | s.d. | p-value    | z-score |                    |
| 1  | 839-890 (Domain II) | 1448           | 3552        | 327.8              | 19.7 | 0          | 57.0    | 0                  |
| 2  | 1458-1498           | 361            | 4639        | 48.8               | 5.52 | 0          | 56.6    | 0                  |
| 3  | 961-1032            | 1270           | 3730        | 343.6              | 17.6 | 0          | 52.7    | 0                  |
| 4  | 11-41 (Domain I)    | 893            | 4107        | 190.8              | 15.0 | 0          | 46.7    | 1                  |
| 5  | 1499-1522           | 293            | 4707        | 40.4               | 5.69 | 0          | 44.4    | 0                  |
| 6  | 1234-1254           | 308            | 4692        | 42.5               | 6.11 | 0          | 43.5    | 0                  |
| 7  | 1159-1190           | 764            | 4236        | 191.0              | 13.6 | 0          | 42.2    | 0                  |
| 8  | 1405-1421           | 90             | 4910        | 6.94               | 2.28 | 0          | 36.5    | 0                  |
| 9  | 629-644             | 241            | 4759        | 38.3               | 5.64 | 0          | 36.0    | 0                  |
| 10 | 130-156             | 290            | 4710        | 69.0               | 7.84 | 0          | 28.2    | 0                  |
| 11 | 161-179             | 174            | 4826        | 35.4               | 5.46 | 0          | 25.4    | 0                  |
| 12 | 492-510             | 78             | 4922        | 14.2               | 3.74 | 0          | 17.1    | 0                  |
| 13 | 290-319             | 320            | 4680        | 145.1              | 11.4 | 0          | 15.3    | 0                  |
| 14 | 327-346             | 99             | 4901        | 29.4               | 5.60 | 0          | 12.4    | 0                  |
| 15 | 693-730             | 462            | 4538        | 335.5              | 18.2 | 0          | 6.94    | 1                  |
| 16 | 737-776             | 224            | 4776        | 154.4              | 13.2 | 0          | 5.26    | 0                  |
| 17 | 442-458             | 169            | 4831        | 117.6              | 11.9 | 0          | 4.33    | 0                  |

Table S7: *MEG3* complete transcript on Domain II Capture-Seq peaks.



| RNA             | Length | FC*  | Norm TTS* | Norm DBD | Sig. DBD | Target Genes    | Rank FC | Rank TTS | Rank DBD | Rank Sum |
|-----------------|--------|------|-----------|----------|----------|-----------------|---------|----------|----------|----------|
| <b>GATA6-AS</b> | 2175   | 6.22 | 740.7     | 2.3      | 2        | <b>Up Genes</b> | 9       | 1        | 23       | 1        |
| JHDM1D-AS1      | 2379   | 3.51 | 3430      | 1.68     | 2        | Up Genes        | 31      | 9        | 4        | 2        |
| HOXB-AS1        | 1550   | 7.34 | 582.6     | 1.94     | 1        | Up Genes        | 3       | 4        | 37       | 3        |
| HOXB-AS1        | 1550   | 7.34 | 552.9     | 1.94     | 1        | Down Genes      | 3       | 4        | 39       | 4        |
| GATA6-AS        | 2175   | 6.22 | 747.6     | 1.38     | 1        | Down Genes      | 9       | 23       | 22       | 5        |
| LINC00261       | 5545   | 4.87 | 2409      | 1.08     | 1        | Up Genes        | 15      | 35       | 8        | 6        |
| KC6             | 5167   | 4.41 | 844.2     | 1.35     | 3        | Up Genes        | 19      | 24       | 19       | 7        |
| SEC24B-AS1      | 2572   | 2.72 | 736       | 1.56     | 1        | Up Genes        | 39      | 12       | 24       | 8        |
| LENG8-AS1       | 1246   | 1.97 | 687.8     | 1.61     | 1        | Up Genes        | 69      | 10       | 27       | 9        |
| PCAT7           | 1161   | 1.51 | 3801      | 1.72     | 1        | Up Genes        | 101     | 6        | 3        | 10       |
| ID2-AS1         | 2049   | 3.73 | 521.7     | 0.98     | 1        | Up Genes        | 27      | 47       | 40       | 11       |
| LENG8-AS1       | 1246   | 1.97 | 582.7     | 1.61     | 1        | Down Genes      | 69      | 10       | 36       | 12       |
| MALAT1          | 8754   | 3.06 | 301.2     | 1.49     | 1        | Down Genes      | 37      | 16       | 64       | 13       |
| ID2-AS1         | 2049   | 3.73 | 433.4     | 0.98     | 1        | Down Genes      | 27      | 47       | 44       | 14       |
| MALAT1          | 8754   | 3.06 | 317.6     | 1.26     | 5        | Up Genes        | 37      | 27       | 60       | 15       |
| NEAT1           | 22766  | 1.69 | 2593      | 1.14     | 13       | Up Genes        | 85      | 34       | 6        | 16       |
| HAND2-AS1       | 9817   | 7.32 | 261.6     | 0.92     | 5        | Up Genes        | 5       | 52       | 71       | 17       |
| LINC00890       | 4756   | 4.43 | 312.9     | 0.84     | 1        | Up Genes        | 17      | 53       | 61       | 18       |
| HAND2-AS1       | 9817   | 7.32 | 266.1     | 0.81     | 1        | Down Genes      | 5       | 56       | 70       | 19       |
| ST7-AS1         | 1888   | 1.74 | 1018      | 1.06     | 1        | Down Genes      | 81      | 40       | 16       | 20       |
| ST7-AS1         | 1888   | 1.74 | 931.1     | 1.06     | 1        | Up Genes        | 81      | 40       | 17       | 21       |
| LINC01089       | 4123   | 2.00 | 378.9     | 1.46     | 3        | Up Genes        | 67      | 19       | 53       | 22       |
| LINC01572       | 4732   | 1.50 | 651.5     | 1.69     | 3        | Up Genes        | 103     | 8        | 29       | 23       |
| LINC00890       | 4756   | 4.43 | 254.2     | 0.84     | 1        | Down Genes      | 17      | 53       | 73       | 24       |
| NEAT1           | 22766  | 1.69 | 1315      | 1.01     | 2        | Down Genes      | 85      | 44       | 14       | 25       |
| BAIAP2-AS1      | 4771   | 1.88 | 329.1     | 1.47     | 6        | Up Genes        | 75      | 18       | 57       | 26       |
| LINC01572       | 4732   | 1.50 | 588.1     | 1.48     | 1        | Down Genes      | 103     | 17       | 35       | 27       |
| MEF2C-AS1       | 5786   | 4.05 | 406.2     | 0.52     | 1        | Down Genes      | 23      | 89       | 46       | 28       |
| ZNF436-AS1      | 2653   | 4.35 | 164.3     | 0.75     | 2        | Up Genes        | 21      | 65       | 84       | 29       |
| BAIAP2-AS1      | 4771   | 1.88 | 284.6     | 1.26     | 5        | Down Genes      | 75      | 27       | 68       | 30       |
| ZNF436-AS1      | 2653   | 4.35 | 145.5     | 0.75     | 1        | Down Genes      | 21      | 65       | 86       | 31       |
| MEF2C-AS1       | 5786   | 4.05 | 454.4     | 0.35     | 2        | Up Genes        | 23      | 107      | 43       | 32       |
| SNAI3-AS1       | 5032   | 1.63 | 216.4     | 1.19     | 6        | Up Genes        | 91      | 30       | 78       | 33       |
| RNF139-AS1      | 6941   | 1.92 | 401.2     | 0.58     | 1        | Down Genes      | 71      | 84       | 49       | 34       |
| RNF139-AS1      | 6941   | 1.92 | 391.4     | 0.58     | 1        | Up Genes        | 71      | 84       | 52       | 35       |
| LINC00894       | 6300   | 3.64 | 127.8     | 0.48     | 3        | Up Genes        | 29      | 94       | 88       | 36       |
| SNAI3-AS1       | 5032   | 1.63 | 175.1     | 0.79     | 2        | Down Genes      | 91      | 60       | 82       | 37       |
| LINC00894       | 6300   | 3.64 | 98.7      | 0.32     | 1        | Down Genes      | 29      | 108      | 98       | 38       |
| FTX             | 6118   | 1.00 | 1109      | 0.65     | 1        | Up Genes        | 147     | 75       | 15       | 39       |
| CKMT2-AS1       | 3874   | 1.00 | 604.3     | 0.77     | 1        | Up Genes        | 149     | 63       | 34       | 40       |
| LINC01138       | 3930   | 1.24 | 113       | 1.02     | 2        | Up Genes        | 117     | 42       | 91       | 41       |
| PWRN1           | 4809   | 1.55 | 232.9     | 0.62     | 1        | Down Genes      | 97      | 78       | 76       | 42       |
| BAALC-AS1       | 3864   | 2.17 | 78.2      | 0.52     | 1        | Up Genes        | 63      | 89       | 106      | 43       |
| RGS5            | 3618   | 1.73 | 110.6     | 0.55     | 1        | Up Genes        | 83      | 86       | 92       | 44       |
| TCEB3-AS1       | 1342   | 1.63 | 67.1      | 0.75     | 1        | Up Genes        | 89      | 65       | 113      | 45       |
| SMC2-AS1        | 7616   | 1.48 | 245.7     | 0.53     | 2        | Up Genes        | 107     | 88       | 74       | 46       |
| SNHG18          | 1949   | 1.58 | 141.6     | 0.51     | 1        | Up Genes        | 95      | 91       | 87       | 47       |
| N4BP2L2-IT2     | 4889   | 2.20 | 64.6      | 0.41     | 1        | Up Genes        | 61      | 98       | 114      | 48       |
| ZNF529-AS1      | 1861   | 1.05 | 94        | 1.07     | 1        | Up Genes        | 141     | 39       | 102      | 49       |
| SDCBP2-AS1      | 4051   | 1.01 | 276.5     | 0.74     | 2        | Up Genes        | 145     | 69       | 69       | 50       |
| SDCBP2-AS1      | 4051   | 1.01 | 256.5     | 0.74     | 1        | Down Genes      | 145     | 69       | 72       | 51       |
| ZBTB11-AS1      | 2742   | 1.13 | 99.9      | 0.73     | 1        | Up Genes        | 129     | 71       | 97       | 52       |
| LINC00960       | 3175   | 1.22 | 70.6      | 0.63     | 1        | Up Genes        | 121     | 77       | 109      | 53       |
| A1BG-AS1        | 2789   | 1.18 | 124.1     | 0.36     | 1        | Up Genes        | 125     | 105      | 89       | 54       |
| DLGAP4-AS1      | 2425   | 1.10 | 67.2      | 0.41     | 1        | Up Genes        | 137     | 98       | 112      | 55       |
| LINC00261       | 5545   | 4.87 | 2226      | 1.08     | 0        | Down Genes      | 15      | 35       | 9        | 56       |
| JHDM1D-AS1      | 2379   | 3.51 | 2688      | 1.26     | 0        | Down Genes      | 31      | 27       | 5        | 57       |

|              |      |      |       |      |   |            |     |     |     |     |
|--------------|------|------|-------|------|---|------------|-----|-----|-----|-----|
| TMCC1-AS1    | 4619 | 3.33 | 4634  | 1.08 | 0 | Up Genes   | 35  | 35  | 1   | 58  |
| SEC24B-AS1   | 2572 | 2.72 | 793.5 | 1.56 | 0 | Down Genes | 39  | 12  | 20  | 59  |
| TMCC1-AS1    | 4619 | 3.33 | 2532  | 1.08 | 0 | Down Genes | 35  | 35  | 7   | 60  |
| KC6          | 5167 | 4.41 | 641.2 | 1.16 | 0 | Down Genes | 19  | 31  | 30  | 61  |
| MANEA-AS1    | 2267 | 2.57 | 338.3 | 2.21 | 0 | Down Genes | 43  | 2   | 55  | 62  |
| DICER1-AS1   | 3719 | 2.37 | 609   | 1.34 | 0 | Up Genes   | 47  | 25  | 33  | 63  |
| MANEA-AS1    | 2267 | 2.57 | 310.1 | 2.21 | 0 | Up Genes   | 43  | 2   | 62  | 64  |
| LINC01473    | 1444 | 3.37 | 374   | 1.39 | 0 | Down Genes | 33  | 21  | 54  | 65  |
| PCAT7        | 1161 | 1.51 | 4039  | 1.72 | 0 | Down Genes | 101 | 6   | 2   | 66  |
| DICER1-AS1   | 3719 | 2.37 | 577.6 | 1.34 | 0 | Down Genes | 47  | 25  | 38  | 67  |
| LINC01473    | 1444 | 3.37 | 305.4 | 1.39 | 0 | Up Genes   | 33  | 21  | 63  | 68  |
| LINC01012    | 3486 | 1.61 | 1935  | 1.15 | 0 | Up Genes   | 93  | 32  | 10  | 69  |
| LINC01012    | 3486 | 1.61 | 1609  | 1.15 | 0 | Down Genes | 93  | 32  | 11  | 70  |
| LINC01089    | 4123 | 2.00 | 322.6 | 1.46 | 0 | Down Genes | 67  | 19  | 58  | 71  |
| RNU12        | 663  | 1.15 | 752.6 | 1.51 | 0 | Down Genes | 127 | 14  | 21  | 72  |
| ACVR2B-AS1   | 2515 | 2.35 | 1574  | 0.4  | 0 | Down Genes | 51  | 102 | 12  | 73  |
| ACVR2B-AS1   | 2515 | 2.35 | 1401  | 0.4  | 0 | Up Genes   | 51  | 102 | 13  | 74  |
| RNU12        | 663  | 1.15 | 660.6 | 1.51 | 0 | Up Genes   | 127 | 14  | 28  | 75  |
| LINC01125    | 6478 | 2.28 | 244.1 | 0.93 | 0 | Down Genes | 57  | 51  | 75  | 76  |
| PPP1R26-AS1  | 3745 | 1.83 | 330.3 | 0.8  | 0 | Down Genes | 79  | 58  | 56  | 77  |
| KCTD21-AS1   | 4090 | 1.44 | 468.5 | 0.98 | 0 | Down Genes | 109 | 47  | 42  | 78  |
| INTS6-AS1    | 9842 | 1.91 | 427.6 | 0.61 | 0 | Down Genes | 73  | 81  | 45  | 79  |
| NIFK-AS1     | 2546 | 1.54 | 477.6 | 0.79 | 0 | Down Genes | 99  | 60  | 41  | 80  |
| PPP1R26-AS1  | 3745 | 1.83 | 290.3 | 0.8  | 0 | Up Genes   | 79  | 58  | 66  | 81  |
| KCTD21-AS1   | 4090 | 1.44 | 396.3 | 0.98 | 0 | Up Genes   | 109 | 47  | 50  | 82  |
| NIFK-AS1     | 2546 | 1.54 | 391.6 | 0.79 | 0 | Up Genes   | 99  | 60  | 51  | 83  |
| INTS6-AS1    | 9842 | 1.91 | 405.2 | 0.51 | 0 | Up Genes   | 73  | 91  | 47  | 84  |
| LINC01125    | 6478 | 2.28 | 221.5 | 0.62 | 0 | Up Genes   | 57  | 78  | 77  | 85  |
| GATA3-AS1    | 2212 | 5.56 | 88.2  | 0    | 0 | Up Genes   | 13  | 115 | 103 | 86  |
| PWRN1        | 4809 | 1.55 | 319.4 | 0.62 | 0 | Up Genes   | 97  | 78  | 59  | 87  |
| RGS5         | 3618 | 1.73 | 104.2 | 0.83 | 0 | Down Genes | 83  | 55  | 96  | 88  |
| CKMT2-AS1    | 3874 | 1.00 | 727.4 | 0.77 | 0 | Down Genes | 149 | 63  | 26  | 89  |
| GATA3-AS1    | 2212 | 5.56 | 70.1  | 0    | 0 | Down Genes | 13  | 115 | 110 | 90  |
| PSMA3-AS1    | 7399 | 1.11 | 402.4 | 0.81 | 0 | Down Genes | 135 | 56  | 48  | 91  |
| LINC01099    | 1587 | 6.91 | 57.3  | 0    | 0 | Down Genes | 7   | 115 | 117 | 92  |
| PSMA3-AS1    | 7399 | 1.11 | 626   | 0.68 | 0 | Up Genes   | 135 | 73  | 32  | 93  |
| FTX          | 6118 | 1.00 | 914   | 0.65 | 0 | Down Genes | 147 | 75  | 18  | 94  |
| LINC01099    | 1587 | 6.91 | 54.2  | 0    | 0 | Up Genes   | 7   | 115 | 121 | 95  |
| ZBED5-AS1    | 1991 | 1.12 | 294.3 | 1    | 0 | Down Genes | 133 | 45  | 65  | 96  |
| OSER1-AS1    | 2180 | 1.18 | 728.9 | 0.46 | 0 | Down Genes | 123 | 95  | 25  | 97  |
| TBX2-AS1     | 1200 | 7.46 | 43.3  | 0    | 0 | Up Genes   | 1   | 115 | 128 | 98  |
| LINC01440    | 3767 | 6.02 | 56.5  | 0    | 0 | Up Genes   | 11  | 115 | 118 | 99  |
| ZBED5-AS1    | 1991 | 1.12 | 288.3 | 1    | 0 | Up Genes   | 133 | 45  | 67  | 100 |
| LINC01440    | 3767 | 6.02 | 47.3  | 0.27 | 0 | Down Genes | 11  | 111 | 125 | 101 |
| OSER1-AS1    | 2180 | 1.18 | 636.7 | 0.46 | 0 | Up Genes   | 123 | 95  | 31  | 102 |
| LINC01138    | 3930 | 1.24 | 105.3 | 1.02 | 0 | Down Genes | 117 | 42  | 94  | 103 |
| TBX2-AS1     | 1200 | 7.46 | 23.3  | 0    | 0 | Down Genes | 1   | 115 | 140 | 104 |
| RAB30-AS1    | 2424 | 1.85 | 167.9 | 0.41 | 0 | Down Genes | 77  | 98  | 83  | 105 |
| RAB30-AS1    | 2424 | 1.85 | 162.5 | 0.41 | 0 | Up Genes   | 77  | 98  | 85  | 106 |
| TMEM161B-AS1 | 4423 | 1.26 | 199.4 | 0.68 | 0 | Down Genes | 113 | 73  | 80  | 107 |
| SNHG18       | 1949 | 1.58 | 115.4 | 0.51 | 0 | Down Genes | 95  | 91  | 90  | 108 |
| BAALC-AS1    | 3864 | 2.17 | 80    | 0.26 | 0 | Down Genes | 63  | 113 | 105 | 109 |
| TCEB3-AS1    | 1342 | 1.63 | 44.7  | 0.75 | 0 | Down Genes | 89  | 65  | 127 | 110 |
| LINC00648    | 3039 | 4.05 | 18.1  | 0    | 0 | Down Genes | 25  | 115 | 143 | 111 |
| LINC00648    | 3039 | 4.05 | 17.8  | 0    | 0 | Up Genes   | 25  | 115 | 144 | 112 |
| ALOX12-AS1   | 3208 | 2.41 | 48.9  | 0    | 0 | Up Genes   | 45  | 115 | 124 | 113 |
| TAPT1-AS1    | 2758 | 2.69 | 41.3  | 0    | 0 | Up Genes   | 41  | 115 | 131 | 114 |
| N4BP2L2-IT2  | 4889 | 2.20 | 64.6  | 0.2  | 0 | Down Genes | 61  | 114 | 114 | 115 |
| SMC2-AS1     | 7616 | 1.48 | 212.7 | 0.39 | 0 | Down Genes | 107 | 104 | 79  | 116 |
| TMEM161B-AS1 | 4423 | 1.26 | 175.9 | 0.45 | 0 | Up Genes   | 113 | 97  | 81  | 117 |

|            |      |      |       |      |   |            |     |     |     |     |
|------------|------|------|-------|------|---|------------|-----|-----|-----|-----|
| CAHM       | 895  | 2.04 | 69.3  | 0    | 0 | Up Genes   | 65  | 115 | 111 | 118 |
| TAPT1-AS1  | 2758 | 2.69 | 31.9  | 0    | 0 | Down Genes | 41  | 115 | 136 | 119 |
| UBL7-AS1   | 1705 | 1.22 | 109.1 | 0.59 | 0 | Up Genes   | 119 | 82  | 93  | 120 |
| CAHM       | 895  | 2.04 | 60.3  | 0    | 0 | Down Genes | 65  | 115 | 116 | 121 |
| ALOX12-AS1 | 3208 | 2.41 | 25.9  | 0    | 0 | Down Genes | 45  | 115 | 139 | 122 |
| MIR210HG   | 2319 | 2.37 | 31.9  | 0    | 0 | Up Genes   | 49  | 115 | 136 | 123 |
| UBL7-AS1   | 1705 | 1.22 | 97.9  | 0.59 | 0 | Down Genes | 119 | 82  | 99  | 124 |
| MIR210HG   | 2319 | 2.37 | 26.3  | 0    | 0 | Down Genes | 49  | 115 | 138 | 125 |
| VIM-AS1    | 1987 | 2.29 | 33.2  | 0    | 0 | Up Genes   | 53  | 115 | 135 | 126 |
| ZBTB11-AS1 | 2742 | 1.13 | 80.6  | 0.73 | 0 | Down Genes | 129 | 71  | 104 | 127 |
| PTOV1-AS1  | 4198 | 2.23 | 39.3  | 0    | 0 | Up Genes   | 59  | 115 | 132 | 128 |
| VIM-AS1    | 1987 | 2.29 | 19.1  | 0    | 0 | Down Genes | 53  | 115 | 142 | 129 |
| MF12-AS1   | 1133 | 2.28 | 14.1  | 0    | 0 | Up Genes   | 55  | 115 | 145 | 130 |
| PTOV1-AS1  | 4198 | 2.23 | 21    | 0    | 0 | Down Genes | 59  | 115 | 141 | 131 |
| MF12-AS1   | 1133 | 2.28 | 8.83  | 0    | 0 | Down Genes | 55  | 115 | 146 | 132 |
| BISPR      | 2520 | 1.48 | 74.2  | 0    | 0 | Up Genes   | 105 | 115 | 107 | 133 |
| A1BG-AS1   | 2789 | 1.18 | 96.1  | 0.36 | 0 | Down Genes | 125 | 105 | 100 | 134 |
| ZNF529-AS1 | 1861 | 1.05 | 74.2  | 0.54 | 0 | Down Genes | 141 | 87  | 107 | 135 |
| FLJ20021   | 788  | 1.12 | 105.3 | 0    | 0 | Down Genes | 131 | 115 | 94  | 136 |
| BISPR      | 2520 | 1.48 | 54    | 0    | 0 | Down Genes | 105 | 115 | 122 | 137 |
| FLJ20021   | 788  | 1.12 | 95.2  | 0    | 0 | Up Genes   | 131 | 115 | 101 | 138 |
| LINC00909  | 3739 | 1.26 | 56.2  | 0    | 0 | Up Genes   | 115 | 115 | 119 | 139 |
| LINC00909  | 3739 | 1.26 | 51.6  | 0.27 | 0 | Down Genes | 115 | 111 | 123 | 140 |
| LINC00960  | 3175 | 1.22 | 55.4  | 0.31 | 0 | Down Genes | 121 | 109 | 120 | 141 |
| LINC01023  | 435  | 1.64 | 0     | 0    | 0 | Up Genes   | 87  | 115 | 149 | 142 |
| LINC01023  | 435  | 1.64 | 0     | 0    | 0 | Down Genes | 87  | 115 | 149 | 143 |
| PAXIP1-AS1 | 2255 | 1.32 | 37.3  | 0    | 0 | Down Genes | 111 | 115 | 133 | 144 |
| PAXIP1-AS1 | 2255 | 1.32 | 36.4  | 0    | 0 | Up Genes   | 111 | 115 | 134 | 145 |
| DLGAP4-AS1 | 2425 | 1.10 | 45.4  | 0    | 0 | Down Genes | 137 | 115 | 126 | 146 |
| DHRS4-AS1  | 3589 | 1.03 | 41.5  | 0.28 | 0 | Down Genes | 143 | 110 | 130 | 147 |
| DHRS4-AS1  | 3589 | 1.03 | 41.8  | 0    | 0 | Up Genes   | 143 | 115 | 129 | 148 |
| LINC01481  | 627  | 1.08 | 4.78  | 0    | 0 | Up Genes   | 139 | 115 | 147 | 149 |
| LINC01481  | 627  | 1.08 | 4.78  | 0    | 0 | Down Genes | 139 | 115 | 147 | 150 |

Table S8: TDF analyses of 75 lncRNAs on up-regulated/down-regulated genes in cardiac differentiation. LncRNAs were ranked by their expression fold change (FC), number of TTS normalized by lncRNA length (Norm TTS) and number of DBD normalized by lncRNA length (Norm DBD).

| DBD Position   | Target Promoters |        | Non-Target Promoters |        | Statistics |                 |
|----------------|------------------|--------|----------------------|--------|------------|-----------------|
|                | TTS              | no TTS | TTS                  | no TTS | Odds ratio | <i>p</i> -value |
| <b>80-112</b>  | 49               | 2024   | 447                  | 32622  | 1.77       | 0.0008          |
| <b>778-811</b> | 59               | 2014   | 471                  | 32598  | 2.03       | 1.2e-05         |
| 860-905        | 246              | 1827   | 4896                 | 28173  | 0.77       | 1.00            |
| 1732-1757      | 61               | 2012   | 1027                 | 32042  | 0.95       | 1.00            |
| 2086-2132      | 158              | 1915   | 2844                 | 30225  | 0.88       | 1.00            |

Table S9: Candidate DBDs from *GATA6-AS* on the differently expressed genes ranked by *p*-values. The significant DBDs are shown in bold.

| #  | Promoter                  | Gene         | TTSs<br>Count | TTS<br>coverage | Fold<br>Change | Sum of<br>Ranks | Overlap<br>Capture-Seq |
|----|---------------------------|--------------|---------------|-----------------|----------------|-----------------|------------------------|
| 1  | chr10:98268249-98269250   | LOXL4        | 11            | 0.0270          | 5.02           | 25              | 1                      |
| 2  | chrX:53048090-53049091    | GPR173       | 9             | 0.05            | 2.35           | 34              | 0                      |
| 3  | chr2:66432451-66433452    | <b>MEIS1</b> | 3             | 0.0320          | 9.19           | 36              | 1                      |
| 4  | chr2:8677844-8678845      | <b>ID2</b>   | 3             | 0.0400          | 3.27           | 46              | 1                      |
| 5  | chr10:79445626-79446627   | ZCCHC24      | 3             | 0.0260          | 3.10           | 58              | 1                      |
| 6  | chr1:244047938-244048939  | ZBTB18       | 4             | 0.0490          | 1.55           | 60              | 1                      |
| 7  | chr2:42047019-42048020    | PKDCC        | 3             | 0.0340          | 2.10           | 66              | 1                      |
| 8  | chr1:156248116-156249117  | PAQR6        | 10            | 0.0270          | 1.50           | 67              | 1                      |
| 9  | chr10:22320210-22321211   | <b>BMI1</b>  | 2             | 0.0400          | 3.09           | 68              | 1                      |
| 10 | chr12:54391297-54392298   | ZNF385A      | 4             | 0.0220          | 2.48           | 70              | 1                      |
| 11 | chr18:22168967-22169968   | GATA6-AS1    | 2             | 0.0230          | 8.82           | 74              | 1                      |
| 12 | chr18:22168442-22169443   | <b>GATA6</b> | 2             | 0.0230          | 6.69           | 76              | 1                      |
| 13 | chr16:50245136-50246137   | ADCY7        | 2             | 0.0250          | 3.52           | 78              | 1                      |
| 14 | chr18:76495189-76496190   | ZNF516       | 2             | 0.0360          | 2.28           | 78              | 1                      |
| 15 | chr3:71583988-71584989    | <b>FOXP1</b> | 3             | 0.0440          | 1.42           | 80              | 1                      |
| 16 | chr7:44103360-44104361    | AEBP1        | 5             | 0.0300          | 1.35           | 81              | 0                      |
| 17 | chr10:68075347-68076348   | HERC4        | 9             | 0.0220          | 1.56           | 83              | 0                      |
| 18 | chr1:143729569-143730570  | RNVU1-18     | 19            | 0.0260          | 1.22           | 85              | 0                      |
| 19 | chr3:50312380-50313381    | NAT6         | 7             | 0.0410          | 1.15           | 85              | 0                      |
| 20 | chr2:45650344-45651345    | PRKCE        | 2             | 0.0250          | 2.51           | 88              | 1                      |
| 21 | chr7:124765626-124766627  | GPR37        | 2             | 0.0230          | 3.13           | 88              | 1                      |
| 22 | chr20:49568145-49569146   | PTGIS        | 6             | 0.06            | 1.04           | 92              | 1                      |
| 23 | chr19:460995-461996       | SHC2         | 2             | 0.0230          | 2.93           | 93              | 1                      |
| 24 | chr19:49851675-49852676   | PTOV1-AS1    | 2             | 0.0250          | 2.23           | 95              | 0                      |
| 25 | chrX:54919461-54920462    | TRO          | 3             | 0.0240          | 1.52           | 96              | 0                      |
| 26 | chr7:102572655-102573656  | POLR2J3      | 10            | 0.0350          | 1.03           | 97              | 0                      |
| 27 | chr7:66627880-66628881    | KCTD7        | 7             | 0.0210          | 1.40           | 104             | 0                      |
| 28 | chr1:23778286-23779287    | TCEB3-AS1    | 2             | 0.0250          | 1.63           | 106             | 1                      |
| 29 | chr19:50568044-50569045   | LRRC4B       | 3             | 0.0420          | 1.10           | 106             | 1                      |
| 30 | chr7:128032106-128033107  | LRRC4        | 3             | 0.0240          | 1.32           | 109             | 1                      |
| 31 | chr9:136326475-136327476  | GPSM1        | 3             | 0.0240          | 1.26           | 114             | 0                      |
| 32 | chr22:19291715-19292716   | CLTCL1       | 2             | 0.0270          | 1.30           | 120             | 0                      |
| 33 | chr2:5691666-5692667      | SOX11        | 3             | 0.0250          | 1.14           | 122             | 1                      |
| 34 | chr17:68601388-68602389   | FAM20A       | 1             | 0.0210          | 5.53           | 132             | 1                      |
| 35 | chr11:18792720-18793721   | PTPN5        | 2             | 0.0200          | 2.46           | 134             | 1                      |
| 36 | chr1:161223630-161224631  | APOA2        | 1             | 0.0210          | 4.50           | 136             | 1                      |
| 37 | chr2:237626575-237627576  | LRRFIP1      | 2             | 0.0250          | 1.14           | 139             | 0                      |
| 38 | chr2:168454861-168455862  | CERS6        | 3             | 0.0200          | 1.46           | 141             | 1                      |
| 39 | chr12:8031702-8032703     | FOXJ2        | 2             | 0.0200          | 1.93           | 145             | 0                      |
| 40 | chr1:211830771-211831772  | LPGAT1       | 1             | 0.0210          | 3.05           | 146             | 0                      |
| 41 | chr18:21241241-21242242   | GREB1L       | 1             | 0.0200          | 7.52           | 155             | 1                      |
| 42 | chr6:90296907-90297908    | BACH2        | 1             | 0.0210          | 2.28           | 155             | 1                      |
| 43 | chr6:1388833-1389834      | FOXF2        | 1             | 0.0200          | 6.06           | 157             | 1                      |
| 44 | chr14:74426101-74427102   | SYNDIG1L     | 1             | 0.0220          | 1.68           | 158             | 0                      |
| 45 | chrX:103728654-103729655  | GLRA4        | 1             | 0.0200          | 4.52           | 161             | 1                      |
| 46 | chr12:132686605-132687606 | PMP22        | 1             | 0.0200          | 4.40           | 163             | 1                      |
| 47 | chr20:22578641-22579642   | LINC00261    | 1             | 0.0180          | 4.87           | 176             | 1                      |
| 48 | chr19:40444704-40445705   | SERTAD3      | 2             | 0.0190          | 1.25           | 177             | 1                      |
| 49 | chr10:117240092-117241093 | SLC18A2      | 1             | 0.0200          | 2.29           | 179             | 1                      |
| 50 | chr9:128919894-128920895  | PHYHD1       | 2             | 0.0200          | 1.15           | 179             | 1                      |

Table S10: Targets of *GATA6-AS* predicted by TDF. Cardiac relevant genes are shown in bold.

---

5' RACE Reverse:  
GATTACGCCAAGCTTCTGGAGGGTAAAAATGCCGGGTCCC

---

3' RACE Forward:  
GATTACGCCAAGCTTTGGAATGGAGAGGCTGGCGACTGGA

---

GATA6-AS chr18:22166894-22169069 strand:-  
ACAGTCCCGCGCCGCCCGCGGGAGGGGCGCTCCAGACCTTGGGTCAGCACGCCCCAGAAGGAAG  
GGGAAACGTGCTCTGCGCCCCCGCCCCCAACCCCGCCTAGCCCTTCACAGCAAATGCGCTTTTTG  
CCCTGAAGTTGTGTGAGACCGACCTTAACTTTCTCCGACCCTATCTCGGGATGCTACGGCTCAGGTCGT  
GGTGGTTTCGGGAACCTCAAGACAACATTCCCAGCTGACCTTTGGAACTTTAACTCGGGTCGTCATGT  
ACGGAAAGGTAGTCTATGGGGTACGCAGAATGAAAAGGGCTCCACATCAGTCGTGCCGAGGACGCTC  
TCCAACCTTTTGATGTCCTGGAGAGTTTCTGATATTTCCCTGGAGAGTTTCAGGTAAGTCACAGATAAGT  
CACTCGGAAGAGGGGGTGTACCTTCCCTGGACCCAGCGCTAAATGCTGCTCCCCACCCCACTTCAT  
ATACACACCCCTCTTCGCTCCCTCCAAACAGTTATCACAACCTCTGTACAACTGATACGGTCCCTAGCG  
GGCAAAGGGACTGGAAATGAACGTCGCGGGGTTATCAGCGCCGATCTGTGAGCGCAACTCGCGCGGCC  
GCAGGCTCGTCCGCTGCAGGAGCCGTGATATATGCTCTGCTCCCTTTCGCTTACAGAAAGGATTTCTTCC  
GACAGACGTGACCCAGAAAGGCTGCCGAGGGAGACTTTAGGACAAGAGGCGTGTGTTTTGTGAAATGAA  
TTTTTATACTTTACCCCGACCCCACTCCCTACCCCGCCAGGTAATCCAAGTAAATGATTTTCTGAA  
GGTCGGTCTCCTAGAAAGCGTTTAGGCTCTGGTTTTTTGTTTTGTTTCTATTTTCGTGTTTTCCAGTTA  
GGGAAGGAAGAGGAGCCTGTGCAGAGTTGAACTGGGGTGGAGAGGTGCCTTGTAAGTATGGTTTCCAGA  
GATGGTGAGACCTCGTAGCTAAGCGTTGTTTCTCTGCACGTAACCTGTGAGTTGTGAACTGTGGCTCCT  
GGGGAGCGGACAGGGCTGGCAGTGGGGGAGGGGCAAGGAATTCAGGAAGTTGGCGAGAATTCCT  
CGTTTTTCATCTTCTGTTGTAATGCTTCTAAACACTTCTGAATTTTAAATGCTACCGAGAAGTCCA  
GAAACCGTTCTCATCCAATTTAGTCACTTTTATTACGTTCCACTTTGCCTCCCCCAATCACTGCGCGGGC  
TCCCAGTTTCAGCGTGGCCGCATTTGAAAAGGCTGAAGGTAGAAAACCTCTGGAATGGAGAGGCTGGCGA  
CTGGAGCAGGATCCAGGGGCTTTAAATTTAACCTGAATGCGATCGAATGCGCGACTCCCAGAAGAGATA  
GCCAGGCGTCCGCCCCGGCCGCTCAACCCCGCCAGGACTCGGAATGCCTTGCTTTTGGTTCTTTTCGTGA  
GTTCCGACCAAATGTTTAAAGTGGACTGGGTTTTGCAGAAGCTCATTGTGAACTGACGGAATGGGTT  
GTGGGCAATTTGATTTCCCTTTGATTCCAACGTTTTGAAATAATGTTTCTCGGATTTGCTATTGCAAGCAAT  
TTTCTAAAAACTCATATCTTATTGCTAAAAATAAACTCTTTGGCTCAGTTTGTGTCCAGGCTGTGTACG  
GCCTCCAACCTGAGCCCGAGGAGATCGAGCCCTGGCGGAGCCTGATCTCTGTCTGTGTTTCTTTT  
GTATTTGCAAGTACAAGGATGTCTGCGTGGATATCCCTGGACACTCGATACCCCGGGGACCTGCTTTT  
CCCGCAGCTCCGACAGCGCGGGAGGGCGCTGGCCCGCGCTGCTGGGACAGAGGTGAGCAGCGG  
GGTGGACATTGACCGATTGACAACGTTTCGGGCTTAAGGGCTCGGGAAGGACCCGGCATTTTACCTC  
CAGATCCCAATCTATTTTAAAAATAATGTTCAAAACATATGGGAAAAATAAGTGATTGCTCCTTTTCA  
TGGTCACAGATTGATTTTATTTTTCAGACTGGTTTTTCCAACCTAACGAGGGAATGGGTAGTGAATGTTG  
TTGTTGTTGTTGTTGTTTATGTTGGTTAATTTGAAAATAAACTGTTTAACTCGTACAGTTGATTCAGAC  
AGAAA

---

Table S11: Primers for GATA6-AS amplification in RACE.

| ASO          | sequence                                |
|--------------|-----------------------------------------|
| GATA6-AS_ASO | C*T*T*T*T*C*C*A*A*A*T*G*C*G*G*C*C*A*C*G |
| ctrl-ASO     | G*C*T*C*T*T*C*A*T*C*T*T*G*T*T*G*G*T*C   |

Table S12: Sequences of the ASOs used in this study. Asterisks represent phosphorothioate bonds.

| Step             | Duration | # of cycles |
|------------------|----------|-------------|
| 95°C             | 2:00 min | 1           |
| 95°C             | 0:05 min |             |
| 60°C             | 0:30 min | 40          |
| Plateread        |          |             |
| 65°C             | 0:05 min |             |
| RAMP 0.5°C/cycle |          | 60          |
| Plateread        |          |             |

Table S13: ASO qPCR protocol.

| qPCR primer     | forward                  | reverse                     |
|-----------------|--------------------------|-----------------------------|
| <i>GATA6-AS</i> | CTGTGACCATGAAAAGGAGCAATC | CCGGCATTTTACCCTCCAGA        |
| <i>GATA6</i>    | TGTGCGTTCATGGAGAAGATCA   | TTTGATAAGAGACCTCATGAACCGACT |
| <i>MEIS1</i>    | CTAACTGACCAGCCCTCTTGG    | TGTTGTCCAAGCCATCACCTT       |
| <i>T</i>        | CCTTGCTCACACCTGCAGTAGC   | GGCCAACCTGCATCATCTCCA       |
| <i>EOMES</i>    | GGCTGTCTCCTAGCAACTCC     | GCATAATACCCTCCCATGCCT       |
| <i>MIXL1</i>    | CAGAACAGGCGTGCCAAGTC     | TTCCAGGAGCACAGTGGTTGA       |
| <i>CDX2</i>     | GCCAACCTGGACTTCCTGTCA    | TCTGGCTTGGATGTTACACAGACC    |
| <i>GATA4</i>    | AATGACTCCAGAACAACAAGTGG  | CTCCCTCCAGTCCCATCAGC        |
| <i>RPL37A</i>   | GTGGTTCCTGCATGAAGACAGTG  | TTCTGATGGCGGACTTTACCG       |
| <i>RPS16</i>    | ACGTGGCCCAGATTTATGCT     | AGCAGGGTCCGGTCATACT         |

Table S14: List of qPCR primers for ASO.

| Group                                | ChOP oligos for GATA6-AS | Sequence                     |
|--------------------------------------|--------------------------|------------------------------|
| Control Oligos for <i>GATA6</i> ChOP | Ctrl_GATA6-AS_1          | CCGTTTTTCGCGTAAACGAC [BtnTg] |
|                                      | Ctrl_GATA6-AS_2          | GTTTCCAGTCGACCCCTTAC [BtnTg] |
|                                      | Ctrl_GATA6-AS_3          | TTTCAACCTCTCGCAGGAG [BtnTg]  |
|                                      | Ctrl_GATA6-AS_4          | TTTGTTGCGGAGAACAGGA [BtnTg]  |
|                                      | Ctrl_GATA6-AS_5          | TGTTGCGAATCGATGCTCCA [BtnTg] |
|                                      | Ctrl_GATA6-AS_6          | GGTTGAAGGACTTAAGGAAC [BtnTg] |
|                                      | Ctrl_GATA6-AS_7          | TAACCTACTCTTGCCAAAGA [BtnTg] |
|                                      | Ctrl_GATA6-AS_8          | TAAGGTCTCAAAGATGGAA [BtnTg]  |
|                                      | Ctrl_GATA6-AS_9          | TGCGTCTGTAGGAACATCTT [BtnTg] |
|                                      | Ctrl_GATA6-AS_10         | CTTGCAACAGCTTAGCCAGT [BtnTg] |
| <i>GATA6-AS</i> ChOP Oligos          | bio_GATA6-AS_1           | GGCAAAAAGCGCATTGCTG [BtnTg]  |
|                                      | bio_GATA6-AS_2           | CAAAGGTCAGCTGGGGAATG [BtnTg] |
|                                      | bio_GATA6-AS_3           | AAAAGTTGGAGAGCGTCCTC [BtnTg] |
|                                      | bio_GATA6-AS_4           | AAAACAACGCCTCTTGTCCT [BtnTg] |
|                                      | bio_GATA6-AS_5           | ACAACGCTTAGCTACGAGGT [BtnTg] |
|                                      | bio_GATA6-AS_6           | CCAACTTCCTGAATTCCTTG [BtnTg] |
|                                      | bio_GATA6-AS_7           | ATTGGATGAGAACGGTTTCT [BtnTg] |
|                                      | bio_GATA6-AS_8           | ATTCCAGAGTTTTCTACCTT [BtnTg] |
|                                      | bio_GATA6-AS_9           | ACGCAGACATCCTTGTAGAA [BtnTg] |
|                                      | bio_GATA6-AS_10          | GAACGTTGTCGAATCGGTCA [BtnTg] |

Table S15: ChOP oligos primers. BtnTg stands for Biotin tag.

| targets | region                   | forward       | Sequence              | reverse       | Sequence                 | product size |
|---------|--------------------------|---------------|-----------------------|---------------|--------------------------|--------------|
| MEIS1   | chr2:66432481-66432504   | MEIS1_ChOP_F1 | GCCAGCTTAGTCCTTTCCC   | MEIS1_ChOP_R1 | AGGCGATTTCTGTTTAATCCTTGG | 125          |
|         |                          | MEIS1_ChOP_F2 | TGGCCTGAAATTCTGCTTCCA | MEIS1_ChOP_R2 | TACCAGCGCCTTTATGCCTC     | 89           |
| ID2     | chr2:8678672-8678693     | ID2_ChOP_F1   | CTTCTCGGTCCTCTTTCTTCC | ID2_ChOP_R1   | AGCTGATCAATGCCTGCGA      | 129          |
|         |                          | ID2_ChOP_F2   | TGAACGCCTCGGTGCAA     | ID2_ChOP_R2   | AAAGCCGGGAGAGGGAGAA      | 118          |
| GATA6   | chr18:22168961-22168981  | GATA6_ChOP_F1 | CGACCCGAGTTAAAGTTCCCA | GATA6_ChOP_R1 | GAAAGTTGTGTGAGACCGACCT   | 130          |
|         |                          | GATA6_ChOP_F2 | TGTTGTCTTGAGGTTCCCGAA | GATA6_ChOP_R2 | TGCCCTGAAGTTGTGTGAGAC    | 99           |
| BMI1    | chr10:22321044-22321164  | BMI1_ChOP_F1  | ACCGACACTAATCCCAGGC   | BMI1_ChOP_R1  | AAACTGACACCGGCTCCAAA     | 117          |
|         |                          | BMI1_ChOP_F2  | TGGCGCTGTGGAGAAATGT   | BMI1_ChOP_R2  | GCCTGGGAATTAGTGTGCGT     | 119          |
| WNT6    | chr2:218859740-218859761 | WNT6_ChOP_F1  | CTGCCTGACTGTCGCAACT   | WNT6_ChOP_R1  | GGAGAAGAAATCAGAGCCGGG    | 105          |
|         |                          | WNT6_ChOP_F2  | CTCTACTCTTCTCCAGCCC   | WNT6_ChOP_R2  | CCTCTCTCGGACTTGGAGC      | 80           |
| FOXP1   | chr3:71583990-71584011   | FOXP1_ChOP_F1 | TAAATAAGGCGCGGAGAGA   | FOXP1_ChOP_R1 | GTGGATGTGACGTCAGGGAC     | 87           |
|         |                          | FOXP1_ChOP_F2 | TAGCTTCCCGAGCCAG      | FOXP1_ChOP_R2 | CTGCGGGAGGTAGAGGGT       | 107          |
| HCN4    | chr15:73369842-73369862  | HCN4_ChOP_F1  | GGTGAGTTCCTGTCCACCC   | HCN4_ChOP_R1  | ACACAGTTGGATCCTTGGCG     | 122          |
|         |                          | HCN4_ChOP_F2  | CTCCCTGTGTTCCATCCAC   | HCN4_ChOP_R2  | CTGCAGACTGGAAGGGAGTG     | 129          |
| FOXP2   | chr7:114085818-114085838 | FOXP2_ChOP_F1 | CCCTGTTTCATTTGCCAGCA  | FOXP2_ChOP_R1 | CAAAGCCGAGTTGTGTCTGC     | 85           |
|         |                          | FOXP2_ChOP_F2 | CAAACAAGTCTCCAGCGGG   | FOXP2_ChOP_R2 | ATTGTTCCGATTTCAGCGG      | 81           |

Table S16: ChOP qPCR primers for up-regulated targets.



| targets | region                             | forward       | Sequence              | reverse       | Sequence              | product size |
|---------|------------------------------------|---------------|-----------------------|---------------|-----------------------|--------------|
| E2F2    | chr1:23531230-23531367             | E2F2_ChOP_F1  | CGATTGCAACACTAGCTTCGC | E2F2_ChOP_R1  | CACTGTGAATCCCGAACCA   | 126          |
|         | AGAcGGAGAAAAAAAAAGAAGAAAAAAAAAAAAA | E2F2_ChOP_F2  | TGGTCCGGGATTCACAGTG   | E2F2_ChOP_R2  | CGCGCCAAAATGTTCCCTT   | 100          |
|         | AGGtGGGGGGGGGGGGGGGGGG             |               |                       |               |                       |              |
| MNS1    | chr15:56465581-56465606            | MNS1_ChOP_F1  | TGCTAGGGACGATGACTGGT  | MNS1_ChOP_R1  | GTGAAGTGAAGGCTGCTGGA  | 114          |
|         | AGtGGGGGGcGGGGGGGGGGGG             | MNS1_ChOP_F2  | TCCAGCAGCCTTCACTCAC   | MNS1_ChOP_R2  | GGTACCTGGACCACATAGCAG | 120          |
| TRNP1   | chr1:26993578-26993600             | TRNP1_ChOP_F1 | CCCGTGTCTATAAAGATGCGC | TRNP1_ChOP_R1 | CAGCACACCCGAACAGCTA   | 82           |
|         | GGGGGGGGGGGGGGGGcGGGG              | TRNP1_ChOP_F2 | GGCGTGCCTGTCTCTGATT   | TRNP1_ChOP_R2 | CACACCCGAACAGCTAGACA  | 121          |

Table S17: ChOP qPCR primers for down-regulated targets.

| Name                   | Sequence (5'-3')                                        |
|------------------------|---------------------------------------------------------|
| <i>MEG3</i> 13-41      | GACGGCGGAGAGCAGAGAGGGAGCGCGC/TEGbiotin                  |
| <i>MEG3</i> 839-890    | CAGUCCCUCCCACCCUCUUGCUUGUCUACUGUCUAUUUAUUCUCA/TEGbiotin |
| <i>GATA6-AS</i> 78-118 | UGCUCUGCGCCCCCGCCCCCAACCCCGCCUAGCCCC /TEGbiotin         |

Table S18: RNA oligo (predicted DBD) used for DBD-Capture-Seq.

## References

- [1] Rao, J., Pfeiffer, M. J., Frank, S., Adachi, K., Piccini, I., Quaranta, R., Araúzo-Bravo, M., Schwarz, J., Schade, D., Leidel, S., Schöler, H. R., Seebohm, G., and Greber, B. (2016) Stepwise Clearance of Repressive Roadblocks Drives Cardiac Induction in Human ESCs. *Cell Stem Cell*.
- [2] Dobin, A., Davis, C. a., Schlesinger, F., Drenkow, J., Zaleski, C., Jha, S., Batut, P., Chaisson, M., and Gingeras, T. R. (2013) STAR: ultrafast universal RNA-seq aligner.. *Bioinformatics (Oxford, England)*, **29**(1), 15–21.
- [3] Harrow, J., Frankish, A., Gonzalez, J. M., Tapanari, E., and Others (sep, 2012) GENCODE: the reference human genome annotation for The ENCODE Project.. *Genome research*, **22**(9), 1760–1774.
- [4] Trapnell, C., Roberts, A., Goff, L., Pertea, G., Kim, D., Kelley, D. R., Pimentel, H., Salzberg, S. L., Rinn, J. L., and Pachter, L. (2012) Differential gene and transcript expression analysis of RNA-seq experiments with TopHat and Cufflinks. *Nature Protocols*, **7**(3), 562–578.
- [5] Frank, S., Zhang, M., Schöler, H. R., and Greber, B. (2012) Small molecule-assisted, line-independent maintenance of human pluripotent stem cells in defined conditions. *PLoS ONE*, **7**(7).
- [6] Akhade, V. S., Arun, G., Donakonda, S., and Satyanarayana Rao, M. R. (2014) Genome wide chromatin occupancy of mrhl RNA and its role in gene regulation in mouse spermatogonial cells. *RNA biology*, **11**(10), 1262–1279.
- [7] Kalwa, M., Hänzelmann, S., Otto, S., Kuo, C.-C. C.-C., Franzen, J., Jousen, S., Fernandez-Rebollo, E., Rath, B., Koch, C., Hofmann, A., Lee, S.-H. S.-H., Teschendorff, A. E. A. A. E., Denecke, B., Lin, Q., Widschwendter, M., Weinhold, E., Costa, I. G. I., and Wagner, W. (dec, 2016) The lncRNA HOTAIR impacts on mesenchymal stem cells via triple helix formation. *Nucleic Acids Research*, **44**(22), 10631–10643.
